# Supplementary material for: Characterizing axonal myelination within the healthy population: a tract-by-tract mapping of effects of age and gender on the fiber g-ratio
Source: PubMed Central journal article supplement (PMC5156474; doi:10.1016/j.neurobiolaging.2016.09.016), 2017-01
Supplement: mmc1.pdf [file mmc1.pdf]

## Supplementary Figure

### Example of Registration between MVF and AVF maps

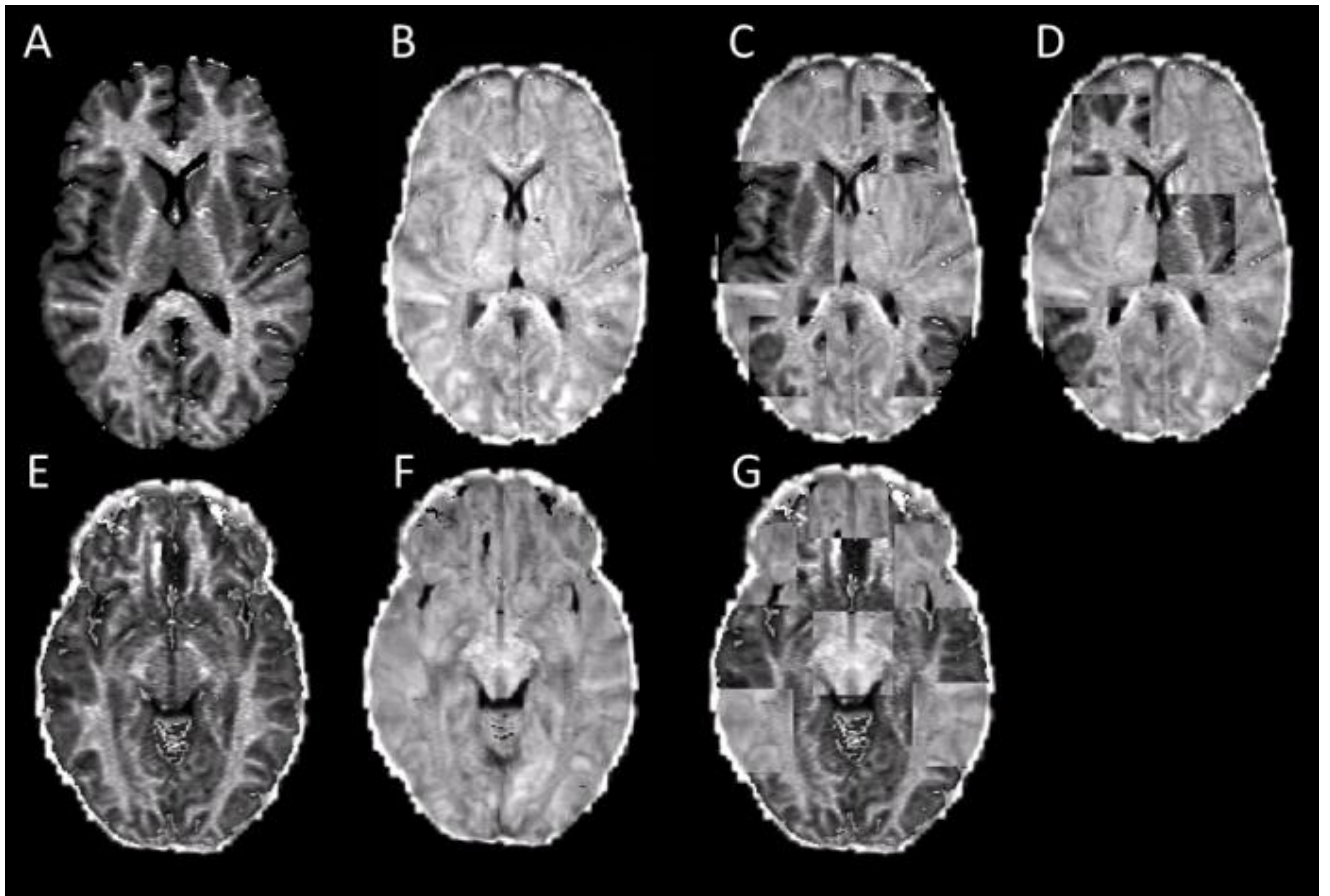

The figure shows two axial sections of MVF (panels A and E) and AVF (B and F) for a participant chosen at random. The goodness of registration can be appreciated from panels C-D and G, where instances of MVF have been overlaid onto AVF map.
